# Supplementary material for: Acquisition of clinical reasoning skills by undergraduate nursing students in Malawi; towards development of a middle-range theory : A qualitative study
Source: Research Square preprint supplement (doi:10.21203/rs.3.rs-4124334/v1), 2024-03-28
Supplement: Supplementary file 1 [file 652a7a57060c5481ee133165.docx]

# **Data collection tool for focus group discussion with undergraduate nursing student. Semi structured interview guide**

**Title**: Acquisition of clinical reasoning skills by undergraduate nursing student in Malawi: towards developing a middle range theory

**Part 1: Biography Particulars of the participant**

1. Tick the box that represents your Sex

| **M** | **F** |
| --- | --- |

1. Your age in years: tick the appropriate column.

| 18- 21 years |  |
| --- | --- |
| 22-25 years |  |
| 26-28 years |  |
| 29-31 years |  |
| 32-35 years |  |
| 1. and above |  |

| 1. Year of study ( tick the box which represents your level of study) | |
| --- | --- |
| 3rd year |  |
| 4th year |  |

**Part 2: Is about acquisition of clinical reasoning**

1. How do you perceive your educational preparation in relation to practice?

Probes: integration of theory into practice

Clinical reasoning skills

1. How does the teaching promote your ability to reasoning?
2. What is your perception on the nature of classroom teaching in relation to development of CR skills during this training?
3. What suggestions would you make as regards to promotion of clinical reasoning?

Thank you
