# Supplementary material for: Acquisition of clinical reasoning skills by undergraduate nursing students in Malawi; towards development of a middle-range theory : A qualitative study
Source: Research Square preprint supplement (doi:10.21203/rs.3.rs-4124334/v1), 2024-03-28
Supplement: Supplementary file 2 [file b88dc66375ad48d71da508d7.docx]

**Table 2. Clinical reasoning process anchors**

| Anchors -categories  Prototype competent based- curriculum (relevant and responsive)  Collaboration between clinical and academics  Qualified nurse educators  Conducive teaching and learning environment  Availability of functional resources  Motivated students | Participants extracts.  *‘The curriculum is student centered which allows them to develop critical thinking and take responsibility’. Participant* 4  *‘Preclinical meetings are conducted before students are sent to the clinical area, post clinical is also done to evaluate the clinical experiences’ participant* 5.  *Some of the nurse educators lack experience. Yet they still teach the students.*  *There is a challenge in both classroom and in the clinical area. If they can be addressed, then student will acquire the clinical reasoning skills.*  *Most of the times, there are no resources, then you wonder how do you demonstrate?*  *Some of the students are motivated but some do not have interest in their own learning.* |
| --- | --- |
