# Supplementary material for: Acquisition of clinical reasoning skills by undergraduate nursing students in Malawi; towards development of a middle-range theory : A qualitative study
Source: Research Square preprint supplement (doi:10.21203/rs.3.rs-4124334/v1), 2024-03-28
Supplement: Supplementary file 3 [file d9809c664e3462d0080794ee.docx]

Table 1. summary of transcribed data

| Themes | Subthemes | Participants quotes |
| --- | --- | --- |
| Classroom and clinical environment | Attitudes of nurse educators  Lack of preparedness by nurse educators  Lack of modelling | *Some lecturers shout at us. (fgd=n1*  ‘*They come to class unprepared, so how can they impart clinical reasoning skills. (fgd=n3).*  *‘when you are in the ward, the qualified nurses fail to transfer the skill to us. Even the nurse educators when they come for supervision, they only greet us and off they go’ (fgd =n5*) |
| Regulatory body functions | Assessment and feedback | ‘*Let me be open here, I don’t think I have ever been assessed on clinical reasoning because the assessment forms do not capture that. We student master the content to pass the exam or an assessment’. (fgd=n6; fgd=n5)* |
| Improved nursing care delivery system and professional image | Quality of care and  Patient satisfaction | ‘*... if we have clinical reasoning skill, we will use the knowledge /skills in dealing with current trends and issues (fgd=N1, fgd=n3). when undergraduate nurse graduate with competency it means they are safe to practice., ‘we feel that unnecessary deaths of patient will be minimized’ fgd=n4; fgd=n2)* |
